# Supplementary material for: SERS substrate based on COFs@Ag for rapid detection of pefloxacin
Source: Research Square preprint supplement (doi:10.21203/rs.3.rs-6055076/v1), 2025-02-21
Supplement: Supplementary file 1 [file dfe673b0f266df4045f1fd6d.docx]

**Supporting Information**

**SERS substrate based on COFs@Ag for rapid detection of pefloxacin**

Kun Chen1,2, Chaoqun Ma1,2, *, Guoqing Chen 1,2, Taiqun Yang1,2, Hui Gao1,2, Lei

Li1,2, Anqi Hu1,2, Jun Cao1,2, Chenkai Zheng1,2, Longyao Ma1,2,Zehao Chen 1,2

*1. School of Science, Jiangnan University, Wuxi, Jiangsu 214122, China*

*2. Jiangsu Provincial Research Center of Light Industrial optoelectronic engineering and Technology, Wuxi, Jiangsu 214122, China*

* Correspondence: machaoqun@jiangnan.edu.cn; Tel.: +86-134-0578-691

**DFT calculations**

Quantum chemical calculations were performed using the B3LYP functional and the 6-311G(d,p) basis set in Gaussian16 software. The electrostatic potential distribution of the precursor of COFs material and PEF molecules was analyzed using the Multiwfn program and VMD visualization software.





**Fig.S1.** UV–Vis spectra of COFs and COFs@Ag.





**Fig.S2.** SERS spectra of different substrates mixed with crystal violet.


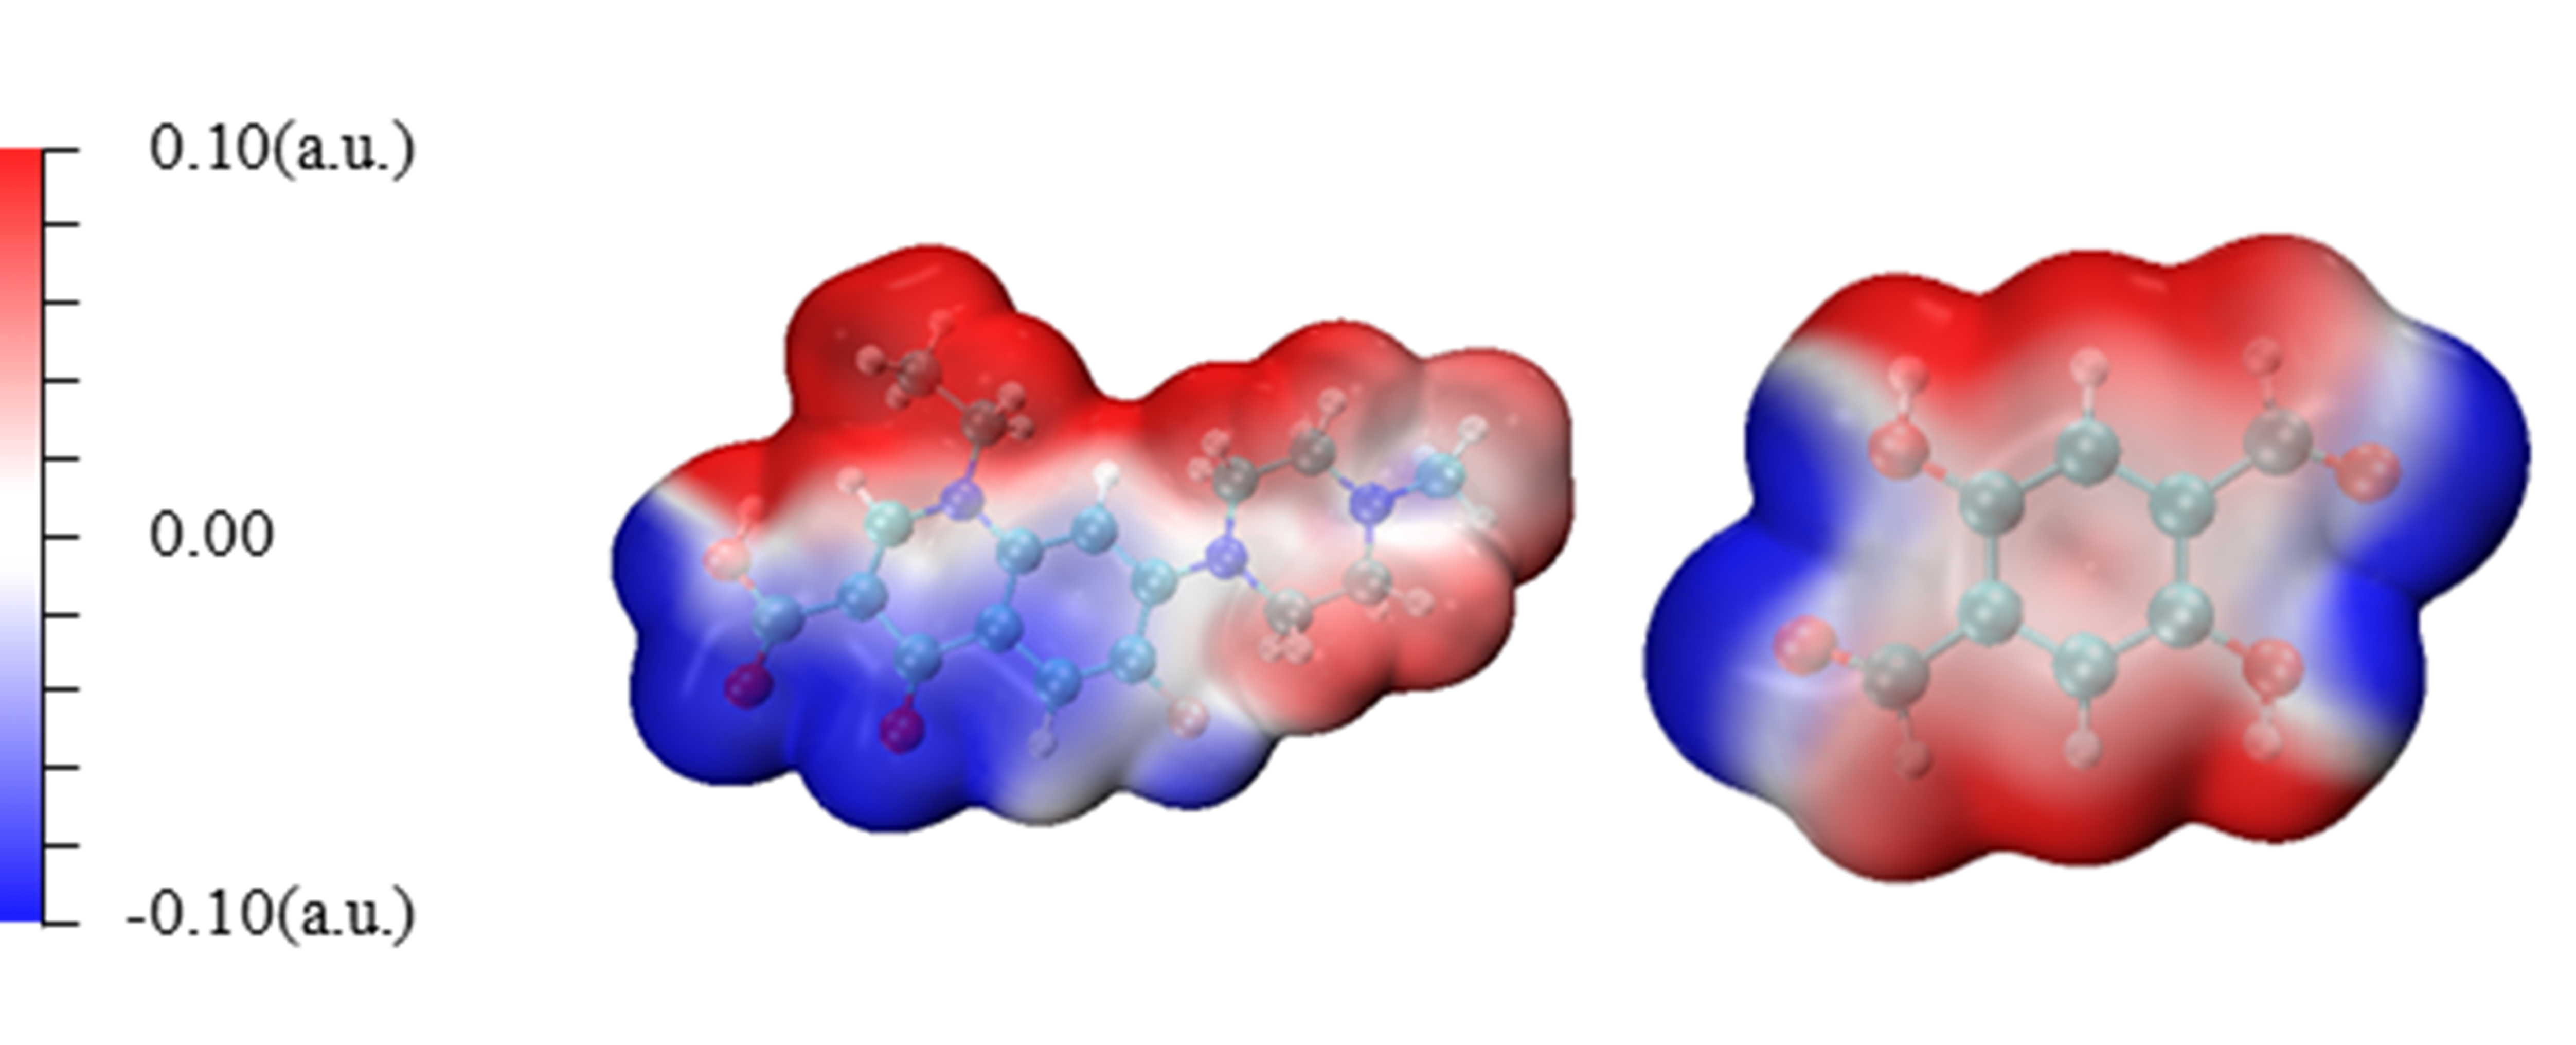


**Fig.S3.** Electrostatic potential map of Pefloxacin and the COFs precursor 2,5-dihydroxyterephthalaldehyde.
